# Supplementary material for: The intestinal virome in children with cystic fibrosis differs from healthy controls
Source: PLOS journal article supplement (doi:10.1371/journal.pone.0233557), 2020-05-22
Supplement: S4 (10.1371/journal.pone.0233557.s004) [file journal.pone.0233557.s004]

## S4 FIGURE

### A. COG (q<0.05)

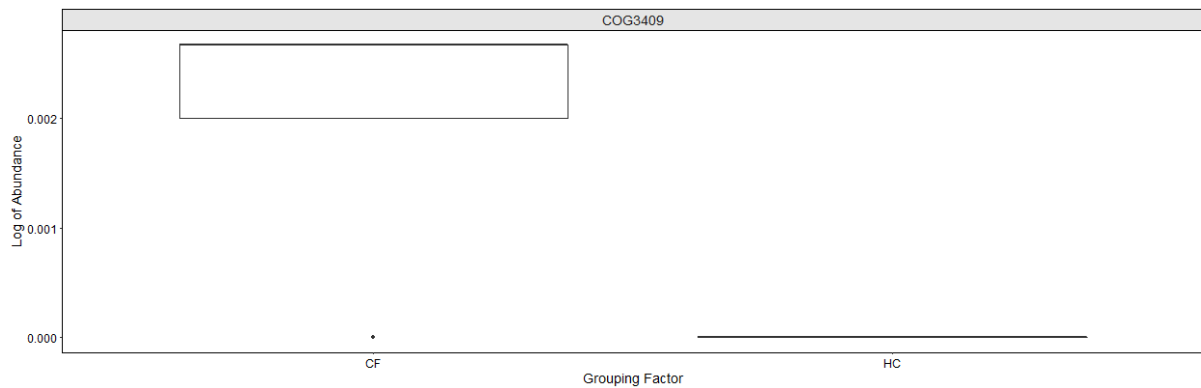

### B. Pfam (q<0.05)

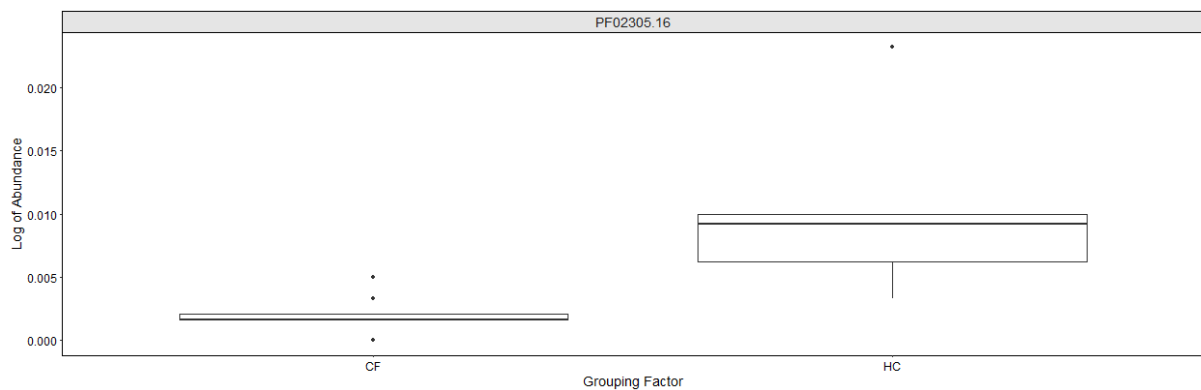

### C. KEGG (q<0.1)

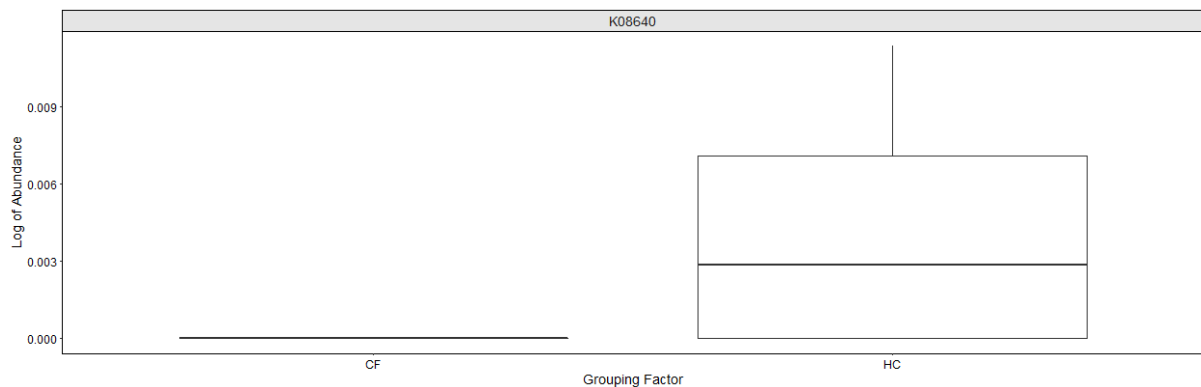

**Supplementary Figure 4.** COG (A) and Pfam (B) terms with a significantly different abundance between CF and HC cohorts using ANCOM analysis ( $q < 0.05$ ). KEGG (C) terms with a different abundance between CF and HC cohorts which was close to significance ( $q < 0.1$ ). COG3409, peptidoglycan-binding (PGRP) domain of peptidoglycan hydrolases; K08640, zinc D-Ala-D-Ala carboxypeptidase; PF02305.16, capsid protein (F protein).
